# Supplementary material
Source: PubMed Central journal article supplement (PMC3934009)
Supplement: NIHMS547201-supplement-1.pdf [file NIHMS547201-supplement-1.pdf]

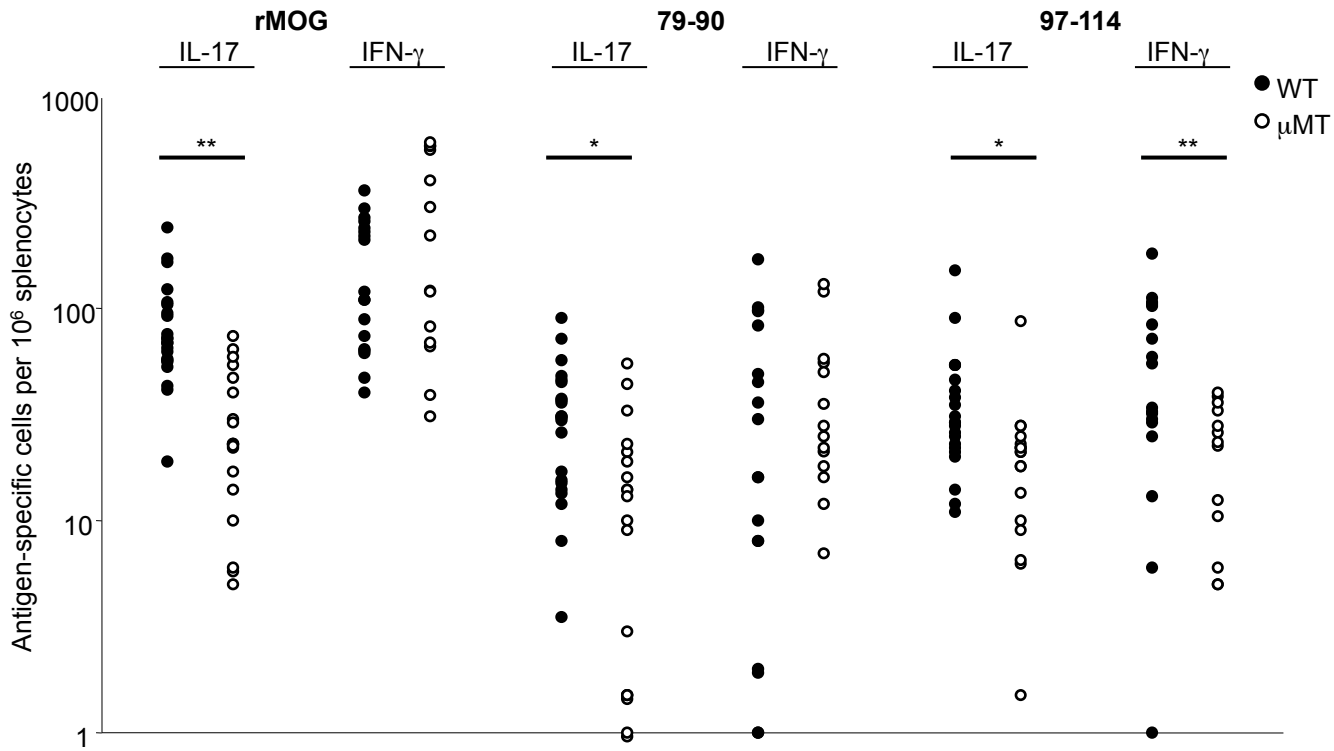

**Figure S1. MOG-specific T cell priming is impaired in  $\mu$ MT mice.**

Splenocytes were isolated from C3HeB/Fej WT and  $\mu$ MT mice 7 days after mice were immunized with rMOG and injected with pertussis toxin. Cells were stimulated in ELISPOT assays with rMOG or MOG<sub>79-90</sub> or MOG<sub>97-114</sub> peptides to detect the number of IFN- $\gamma$ - and IL-17-producing cells per million splenocytes. Each data point represents a single mouse. Data were pooled from 3 independent experiments. \* $P < 0.05$ , \*\* $P < 0.005$ , Student's  $t$  test.

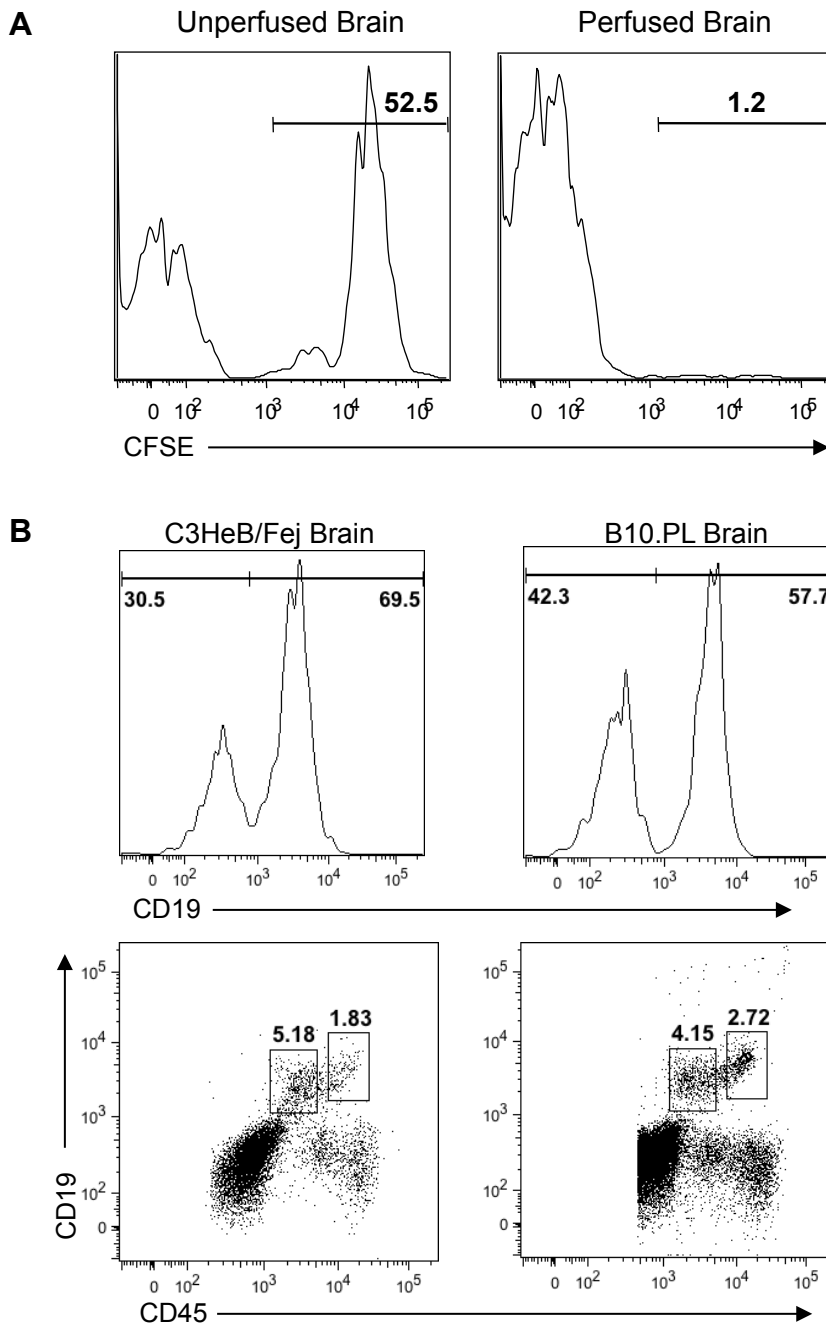

**Figure S2. Perfusion efficiency and comparison of CNS B cell subsets in perfused C3HeB/Fej and B10.PL mice.**

**(A)** Absence of blood contamination in CNS cells from perfused mice was confirmed by injecting CFSE-labeled splenocytes 1 hour prior to isolation of mononuclear cells from brains of unperfused or perfused mice. Flow cytometric analysis of CFSE labeled cells through the CD45<sup>+</sup>MHC class II<sup>+</sup>CD19<sup>+</sup> B cell gate is shown. Data are representative of two experiments.

**(B)** Mononuclear cells were isolated from the brains of perfused naïve C3HeB/Fej and B10.PL mice and stained for CD45, MHC class II (either I-A<sup>k</sup> or I-A<sup>u</sup>), and CD19. Representative histograms of CD19 expression are shown through the CD45<sup>+</sup>MHC class II<sup>+</sup> gate (top), and analysis of CD45<sup>+</sup> and CD19<sup>+</sup> expression is shown through the CD45<sup>+</sup> gate (bottom). Data are representative of three experiments.

**A**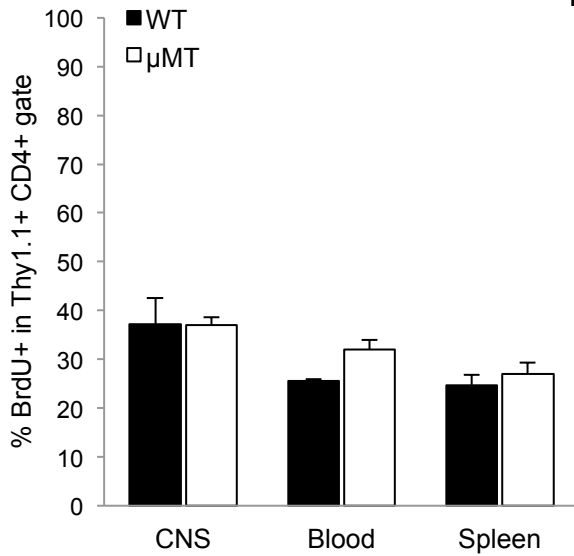**B**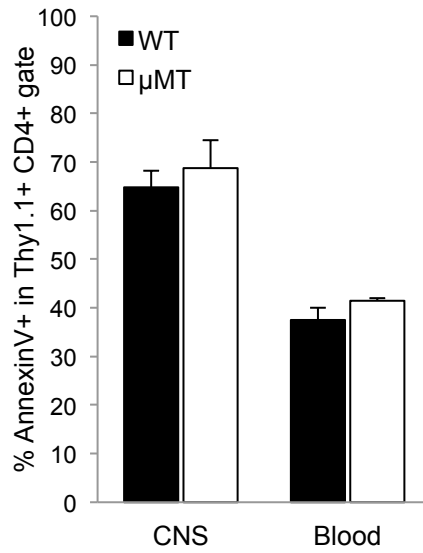

**Figure S3. MOG-specific T cells exhibit similar levels of proliferation and apoptosis in the CNS of wild-type and B cell-deficient recipients.**

Activated MOG-specific Thy1.1<sup>+</sup> T cells were transferred into WT or μMT Thy1.2 recipients. BrdU was injected on day 4 post-transfer. CNS mononuclear cells were isolated on day 5 and analyzed for percentages of (A) BrdU<sup>+</sup> or (B) AnnexinV<sup>+</sup> cells among gated Thy1.1<sup>+</sup> CD4<sup>+</sup> donor cells (means ± SEM, n ≥ 4 mice per group). Data are representative of 3 independent experiments.

| Gene <sup>a</sup> | D5 <sup>b</sup> | EAE <sup>b</sup> | Forward primer (5'-3') <sup>c</sup> | Reverse primer (5'-3') <sup>c</sup> |
|-------------------|-----------------|------------------|-------------------------------------|-------------------------------------|
| IL-17A            | Y               | Y                | CTCAAAGCTCAGCGTGTCCAAACA            | TATCAGGGTCTTCATTGCGGTGGA            |
| IFN- $\gamma$     | Y               | Y                | AACGCTACACACTGCATCTTGG              | GCCGTGGCAGTAACAGCC                  |
| GM-CSF            | Y               | Y                | CACCCGGCCTTGGAAAGCATGTAGA           | GCATGTCATCCAGGAGGTTCA               |
| TNF $\alpha$      | Y               | Y                | GCACAGAAAGCATGACCCG                 | GCCCCCATCTTTTGGG                    |
| IL-6              | Y               | Y                | GCTACCAAACCTGGATATAATCAGG           | CCAGGTAGCTATGGTACTCCAGAA            |
| IL-1 $\beta$      | Y               | Y                | TGTAATGAAAGACGGCACACC               | TCTTCTTTGGGTATTGCTTGG               |
| IL-10             | N               | Y                | GGTTGCCAAGCCTTATCGGA                | ACCTGCTCCACTGCCTTGCT                |
| IL-12 p35         | N               | N                | AAATGAAGCTCTGCATCCTGC               | TCACCCTGTTGATGGTCACG                |
| IL-23 p19         | N               | Y                | GAACAAGATGCTGGATTGCAGAG             | TGTGCGTTCAGGCTAGCA                  |
| LT $\alpha$       | N               | Y                | GTGCCTTTCTCCGACATGG                 | GGTAGATGGGAGTGGGAATGG               |
| LT $\beta$        | N               | Y                | TCCAATGCTTCCAGGAATCTAGC             | GATCTGGTGTAGAATCCGCAG               |
| VCAM              | N               | Y                | TGGTGAAATGGAATCTGAACC               | CCCAGATGGTGGTTTCCTT                 |
| ICAM              | Y               | Y                | CCCACGCTACCTCTGCTC                  | GATGGATACCTGAGCATCACC               |
| E-selectin        | Y               | Y                | TCCTCTGGAGAGTGGAGTGC                | GGTGGGTCAAAGCTTCACAT                |
| P-selectin        | Y               | Y                | GTGCAGAGCGGTCAAATGC                 | CTGAGAGCTTTCTTAGCAGAGC              |
| iNOS              | N               | Y                | TTGATGTGCTGCCTCTGGTCTTGC            | AGCTCCTGGAACCACTCGTACTT             |
| CCL1              | N               | Y                | CCCCTGAAGTTTATCCAGTGTTA             | GCAGCTTTCTCTACCTTTGTTC              |
| CCL2              | Y               | Y                | CCACTCACCTGCTGCTACT                 | TCTGGACCCATTCTTCTTG                 |
| CCL3              | N               | Y                | TGTACCATGACACTCTGCAAC               | CAACGATGAATTGGCGTGGAA               |
| CCL4              | Y               | Y                | TCTTGCTCGTGGCTGCCT                  | GGGAGGGTCAGAGCCCA                   |
| CCL5              | N               | Y                | TTGCCTACCTCTCCCTCG                  | CGACTGCAAGATTGGAGCACT               |
| CCL6              | N               | Y                | CAAAGAAGGGCATGGAAGTCTG              | ATCCCTTAGGACCGTGATCAAC              |
| CCL7              | Y               | Y                | CAAAGAAGGGCATGGAAGTCTG              | ATCCCTTAGGACCGTGATCAAC              |
| CCL9              | N               | Y                | CTCACAACCACGGACCTAC                 | TGTGTAGTCATTGAGGTCAGC               |
| CCL19             | N               | Y                | TGTGGCCTGCCTCAGATTAT                | AGTCTTCCGCATCATTAGCAC               |
| CCL20             | Y               | Y                | TTTTGGGATGGAATTGGACAC               | TGCAGGTGAAGCCTTCAACC                |
| CXCL1             | Y               | Y                | CTGCACCCAAACCGAAGTC                 | AGCTTCAGGGTCAAGGCAAG                |
| CXCL2             | Y               | Y                | CGCTGTCAATGCCTGAAG                  | GGCGTCACACTCAAGCTCT                 |
| CXCL9             | Y               | Y                | AATGCACGATGCTCCTGCA                 | AGGTCTTTGAGGGATTTGTAGTG             |
| CXCL10            | Y               | Y                | GCCGTCATTTTCTGCCTCA                 | CGTCCTTGCGAGAGGGATC                 |
| MMP3              | N               | Y                | TTGTTCTTTGATGCAGTCAGC               | GATTTGCGCCAAAAGTGC                  |
| MMP8              | N               | Y                | AACGGGAAGACATACTTCTTCATA            | TGGGTTTCATGGATCTTCTTTG              |
| MMP9              | N               | Y                | ACGACATAGACGGCATCCA                 | GCTGTGGTTCAGTTGTGGTG                |

**Table S1. Expression of genes analyzed by RT-qPCR in preclinical and acute EAE**

<sup>a</sup>Genes whose expression was analyzed by RT-qPCR in the brains of WT recipients of MOG-specific T cells on day 5 post-transfer and after onset of EAE. <sup>b</sup>(Y) denotes genes that were induced relative to healthy controls at the indicated time point. <sup>c</sup>Primers used to detect each gene are shown.
